# Supplementary material
Source: publisher figshare collection journal article supplement (https://acs.figshare.com/ndownloader/files/4701712)
Supplement: Supplementary file 1 [file 4701712]

#\#CIF_1.1
 
#  CIF produced by WinGX routine CIF_UPDATE
#  Created on 2006-09-19 at 14:55:50
#  Using CIFtbx version 2.6.2 16 Jun 1998
 
#  Dictionary name : cif_core.dic
#  Dictionary vers : 2.3
#  Request file    : c:\wingx\files\archive.dat
#  CIF files read  : struct tpa3 dreduc
 
 
data_struct
 
_audit_creation_date                    2006-09-19T14:55:50-00:00
_audit_creation_method                  'WinGX routine CIF_UPDATE'
_audit_conform_dict_name                cif_core.dic
_audit_conform_dict_version             2.3
_audit_conform_dict_location            ftp://ftp.iucr.org/pub/cif_core.dic
_publ_requested_category                FO
_publ_contact_author_name 'Hidenori Murata, Paul M. Lahti'
_publ_contact_author_address
;
Department of Chemistry, University of Massachusetts, Amherst, MA 01003 USA
;
_publ_contact_author_email 'lahti@chem.umass.edu '
_publ_contact_author_fax '1-413-545-4490 '
_publ_contact_author_phone '1-413-545-4890'

_publ_section_title
;
Synthesis and Oxidation of Triarylamine Derivatives 
Bearing Hydrogen Bonding Groups
;

_publ_requested_journal ' Journal of Organic Chemistry '

_publ_section_abstract
;
;

_publ_section_comment
;

The study of the titled structure was undertaken to establish its three
dimensional structure.  Geometries are tabulated below.  All Diagrams and
calculations were performed using maXus (Nonius, Delft & MacScience, Japan).
Structural analysis was carried out with assistance from 
Dr. Peter Khalifah, director of the University of 
Massachusetts Amherst X-ray Structural Characterization Facility.
;
 
#----------------------------------------------------------------------------#
#                   CHEMICAL INFORMATION                                     #
#----------------------------------------------------------------------------#
 
_chemical_name_systematic
;
 ?
;
_chemical_formula_moiety                'C22 H19 N1 O6'
_chemical_formula_sum                   'C22 H19 N1 O6'
_chemical_formula_weight                393.38
_chemical_compound_source               'synthesis as described'
 
#----------------------------------------------------------------------------#
#                   UNIT CELL INFORMATION                                    #
#----------------------------------------------------------------------------#
 
_symmetry_cell_setting                  triclinic
_symmetry_space_group_name_H-M          'P -1'
_symmetry_space_group_name_Hall         '-P 1'
_symmetry_Int_Tables_number             2
loop_
    _symmetry_equiv_pos_as_xyz
'x, y, z'
'-x, -y, -z'
 
_cell_length_a                          6.7400(5)
_cell_length_b                          8.9687(7)
_cell_length_c                          16.8973(11)
_cell_angle_alpha                       90.839(4)
_cell_angle_beta                        82.749(4)
_cell_angle_gamma                       86.109(4)
_cell_volume                            1010.7(10)
_cell_formula_units_Z                   2
_cell_measurement_temperature           293
_cell_measurement_reflns_used           3253
_cell_measurement_theta_min             0.998
_cell_measurement_theta_max             25.028
_cell_measurement_wavelength            0.71073
 
#----------------------------------------------------------------------------#
#                   CRYSTAL INFORMATION                                      #
#----------------------------------------------------------------------------#
 
_exptl_crystal_description              prism
_exptl_crystal_colour                   colorless
_exptl_crystal_size_max                 0.2
_exptl_crystal_size_mid                 0.2
_exptl_crystal_size_min                 0.2
_exptl_crystal_density_diffrn           1.293
_exptl_crystal_density_method           'not measured'
_exptl_crystal_F_000                    412
_exptl_special_details
;
 ?
;
 
#----------------------------------------------------------------------------#
#                   ABSORPTION CORRECTION                                    #
#----------------------------------------------------------------------------#
 
_exptl_absorpt_coefficient_mu           0.095
_exptl_absorpt_correction_type          none
 
#----------------------------------------------------------------------------#
#                   DATA COLLECTION                                          #
#----------------------------------------------------------------------------#
 
_diffrn_source                          'Enraf Nonius FR590'
_diffrn_ambient_temperature             293
_diffrn_radiation_wavelength            0.71069
_diffrn_radiation_type                  MoK\a
_diffrn_radiation_monochromator         graphite
_diffrn_radiation_probe                 x-ray
_diffrn_detector                        'CCD plate'
_diffrn_detector_area_resol_mean        9
_diffrn_orient_matrix_type
                                     'by Bruker AXS Collect from scalepack cell'
_diffrn_orient_matrix_ub_11             0.522855E-1
_diffrn_orient_matrix_ub_12             0.95716E-1
_diffrn_orient_matrix_ub_13             0.16717E-1
_diffrn_orient_matrix_ub_21             -0.134165
_diffrn_orient_matrix_ub_22             0.308812E-1
_diffrn_orient_matrix_ub_23             0.30185E-1
_diffrn_orient_matrix_ub_31             0.417919E-1
_diffrn_orient_matrix_ub_32             -0.487974E-1
_diffrn_orient_matrix_ub_33             0.486874E-1
_diffrn_measurement_device              '95mm CCD camera on \k-goniostat'
_diffrn_measurement_device_type         KappaCCD
_diffrn_measurement_method              'CCD rotation images, thick slices'
_diffrn_reflns_av_R_equivalents         0.0449
_diffrn_reflns_av_unetI/netI            0.059
_diffrn_reflns_number                   5931
_diffrn_reflns_limit_h_min              -7
_diffrn_reflns_limit_h_max              7
_diffrn_reflns_limit_k_min              -10
_diffrn_reflns_limit_k_max              10
_diffrn_reflns_limit_l_min              -20
_diffrn_reflns_limit_l_max              20
_diffrn_reflns_theta_min                3.77
_diffrn_reflns_theta_max                24.93
_diffrn_reflns_theta_full               24.93
_diffrn_measured_fraction_theta_full
                                        0.981
_diffrn_measured_fraction_theta_max
                                        0.981
_reflns_number_total                    3448
_reflns_number_gt                       2110
_reflns_threshold_expression            >2sigma(I)
 
#----------------------------------------------------------------------------#
#                   COMPUTER PROGRAMS USED                                   #
#----------------------------------------------------------------------------#
 
_computing_data_collection              'Collect (Bruker AXS BV, 1997-2004)'
_computing_cell_refinement
                                       'HKL Scalepack (Otwinowski & Minor 1997)'
_computing_data_reduction
                             'HKL Denzo and Scalepack (Otwinowski & Minor 1997)'
_computing_structure_solution           'SHELXS-86 (Sheldrick, 1986)'
_computing_structure_refinement         'SHELXL-97 (Sheldrick, 1997)'
_computing_molecular_graphics           'Ortep-3 for Windows (Farrugia, 1997)'
_computing_publication_material
                                   'WinGX publication routines (Farrugia, 1999)'
 
#----------------------------------------------------------------------------#
#                   REFINEMENT INFORMATION                                   #
#----------------------------------------------------------------------------#
 
_refine_special_details
;
 Refinement of F^2^ against ALL reflections.  The weighted R-factor wR and
 goodness of fit S are based on F^2^, conventional R-factors R are based
 on F, with F set to zero for negative F^2^. The threshold expression of
 F^2^ > 2sigma(F^2^) is used only for calculating R-factors(gt) etc. and is
 not relevant to the choice of reflections for refinement.  R-factors based
 on F^2^ are statistically about twice as large as those based on F, and R-
 factors based on ALL data will be even larger.
;
_refine_ls_structure_factor_coef        Fsqd
_refine_ls_matrix_type                  full
_refine_ls_weighting_scheme             calc
_refine_ls_weighting_details
         'calc w=1/[\s^2^(Fo^2^)+(0.1149P)^2^+0.3207P] where P=(Fo^2^+2Fc^2^)/3'
_atom_sites_solution_primary            direct
_atom_sites_solution_secondary          difmap
_atom_sites_solution_hydrogens          geom
_refine_ls_hydrogen_treatment           noref
_refine_ls_extinction_method            SHELXL
_refine_ls_extinction_expression
                                    Fc^*^=kFc[1+0.001xFc^2^\l^3^/sin(2\q)]^-1/4^
_refine_ls_extinction_coef              0.033(10)
_refine_ls_number_reflns                3448
_refine_ls_number_parameters            303
_refine_ls_number_restraints            0
_refine_ls_R_factor_all                 0.1109
_refine_ls_R_factor_gt                  0.0674
_refine_ls_wR_factor_ref                0.2226
_refine_ls_wR_factor_gt                 0.1851
_refine_ls_goodness_of_fit_ref          1.042
_refine_ls_restrained_S_all             1.042
_refine_ls_shift/su_max                 0.048
_refine_ls_shift/su_mean                0.006
_refine_diff_density_max                0.526
_refine_diff_density_min                -0.218
_refine_diff_density_rms                0.046
 
#----------------------------------------------------------------------------#
#                   ATOMIC TYPES, COORDINATES AND THERMAL PARAMETERS         #
#----------------------------------------------------------------------------#
 
loop_
    _atom_type_symbol
    _atom_type_number_in_cell
C 44
H 38
N 2
O 12
 
loop_
    _atom_site_label
    _atom_site_type_symbol
    _atom_site_fract_x
    _atom_site_fract_y
    _atom_site_fract_z
    _atom_site_U_iso_or_equiv
    _atom_site_adp_type
    _atom_site_occupancy
    _atom_site_symmetry_multiplicity
    _atom_site_calc_flag
    _atom_site_refinement_flags
    _atom_site_disorder_assembly
    _atom_site_disorder_group
O25 O 0.8237(3) -0.1269(3) 1.01502(14) 0.0619(6) Uani 1 1 d . . .
O26 O 0.8814(3) 0.0332(3) 0.91576(14) 0.0658(7) Uani 1 1 d . . .
H26 H 0.9713 0.0553 0.9413 0.099 Uiso 1 1 calc R . .
O28 O 0.0442(3) -0.4068(3) 0.91518(14) 0.0712(7) Uani 1 1 d . . .
N17 N 0.3248(4) 0.0111(3) 0.74966(17) 0.0672(8) Uani 1 1 d . . .
C23 C 0.4890(4) -0.2229(3) 0.9489(2) 0.0510(8) Uani 1 1 d . . .
O29 O 0.2246(4) -0.4228(3) 1.01642(16) 0.0803(8) Uani 1 1 d . . .
H29 H 0.1325 -0.4721 1.0351 0.12 Uiso 1 1 calc R . .
C18 C 0.3846(5) -0.0701(3) 0.81394(18) 0.0543(8) Uani 1 1 d . . .
C21 C 0.6054(4) -0.1128(3) 0.91497(18) 0.0492(7) Uani 1 1 d . . .
C27 C 0.1872(4) -0.3711(3) 0.94953(19) 0.0546(8) Uani 1 1 d . . .
C20 C 0.5555(5) -0.0389(4) 0.84807(19) 0.0545(8) Uani 1 1 d . . .
C19 C 0.2708(5) -0.1835(4) 0.84696(19) 0.0541(8) Uani 1 1 d . . .
C8 C 0.4074(5) 0.1522(4) 0.7317(2) 0.0591(8) Uani 1 1 d . . .
C24 C 0.7822(4) -0.0694(3) 0.95236(19) 0.0502(8) Uani 1 1 d . . .
C22 C 0.3211(4) -0.2576(3) 0.91366(18) 0.0503(8) Uani 1 1 d . . .
O2 O 0.7093(5) 0.5380(3) 0.68828(18) 0.0988(10) Uani 1 1 d . . .
C16 C 0.2355(5) -0.0646(4) 0.68952(19) 0.0613(9) Uani 1 1 d . . .
C3 C 0.6018(6) 0.4123(4) 0.7053(2) 0.0714(10) Uani 1 1 d . . .
C7 C 0.3990(7) 0.2596(4) 0.7908(3) 0.0808(12) Uani 1 1 d . . .
C6 C 0.5071(6) 0.1796(4) 0.6575(2) 0.0712(10) Uani 1 1 d . . .
C5 C 0.6030(6) 0.3105(5) 0.6445(2) 0.0775(11) Uani 1 1 d . . .
C14 C 0.0592(7) -0.0103(6) 0.6665(3) 0.0835(12) Uani 1 1 d . . .
O10 O 0.0144(6) -0.3045(6) 0.5133(2) 0.1392(15) Uani 1 1 d . . .
C15 C 0.3293(7) -0.1953(6) 0.6538(3) 0.0844(12) Uani 1 1 d . . .
C4 C 0.4977(7) 0.3894(4) 0.7778(3) 0.0834(12) Uani 1 1 d . . .
C11 C 0.0808(8) -0.2204(6) 0.5737(2) 0.0932(15) Uani 1 1 d . . .
C12 C 0.2545(8) -0.2694(6) 0.5970(3) 0.1024(15) Uani 1 1 d . . .
H12 H 0.3236 -0.3555 0.5736 0.123 Uiso 1 1 calc R . .
C13 C -0.0237(6) -0.0892(7) 0.6059(3) 0.1017(16) Uani 1 1 d . . .
H13 H -0.1435 -0.0543 0.5885 0.122 Uiso 1 1 calc R . .
C1 C 0.8078(9) 0.5931(6) 0.7489(3) 0.1194(19) Uani 1 1 d . . .
H1A H 0.7147 0.6095 0.7966 0.179 Uiso 1 1 calc R . .
H1B H 0.8625 0.6858 0.733 0.179 Uiso 1 1 calc R . .
H1C H 0.9143 0.5221 0.7589 0.179 Uiso 1 1 calc R . .
C9 C -0.1715(8) -0.2834(9) 0.4948(4) 0.152(3) Uani 1 1 d . . .
H9A H -0.2399 -0.2001 0.5256 0.228 Uiso 1 1 calc R . .
H9B H -0.2418 -0.3716 0.5066 0.228 Uiso 1 1 calc R . .
H9C H -0.1668 -0.2632 0.439 0.228 Uiso 1 1 calc R . .
H19 H 0.152(5) -0.207(3) 0.8241(18) 0.057(8) Uiso 1 1 d . . .
H20 H 0.635(5) 0.031(4) 0.827(2) 0.071(10) Uiso 1 1 d . . .
H23 H 0.514(5) -0.262(4) 0.997(2) 0.059(9) Uiso 1 1 d . . .
H6 H 0.514(6) 0.102(4) 0.613(2) 0.087(12) Uiso 1 1 d . . .
H7 H 0.338(6) 0.251(4) 0.843(3) 0.086(12) Uiso 1 1 d . . .
H5 H 0.667(6) 0.338(4) 0.588(3) 0.096(13) Uiso 1 1 d . . .
H14 H -0.001(7) 0.072(5) 0.690(3) 0.101(16) Uiso 1 1 d . . .
H4 H 0.507(6) 0.461(5) 0.821(3) 0.102(14) Uiso 1 1 d . . .
H15 H 0.432(8) -0.251(6) 0.678(3) 0.14(2) Uiso 1 1 d . . .
 
loop_
    _atom_site_aniso_label
    _atom_site_aniso_U_11
    _atom_site_aniso_U_22
    _atom_site_aniso_U_33
    _atom_site_aniso_U_23
    _atom_site_aniso_U_13
    _atom_site_aniso_U_12
O25 0.0573(13) 0.0696(14) 0.0645(14) 0.0103(11) -0.0172(11) -0.0256(11)
O26 0.0536(13) 0.0760(15) 0.0737(15) 0.0133(12) -0.0143(11) -0.0326(11)
O28 0.0661(14) 0.0785(16) 0.0772(16) 0.0136(12) -0.0207(12) -0.0417(12)
N17 0.0808(19) 0.0676(18) 0.0617(17) 0.0173(14) -0.0256(14) -0.0326(15)
C23 0.0483(16) 0.0511(17) 0.0558(19) 0.0043(15) -0.0084(14) -0.0146(13)
O29 0.0733(16) 0.0908(19) 0.0872(18) 0.0378(15) -0.0251(14) -0.0468(14)
C18 0.0557(17) 0.0581(18) 0.0529(17) 0.0068(14) -0.0117(14) -0.0223(15)
C21 0.0409(15) 0.0550(17) 0.0534(18) -0.0011(14) -0.0052(13) -0.0166(13)
C27 0.0496(17) 0.0549(18) 0.062(2) 0.0069(15) -0.0096(15) -0.0194(14)
C20 0.0519(17) 0.0562(18) 0.0577(19) 0.0061(15) -0.0050(14) -0.0239(15)
C19 0.0489(17) 0.0592(19) 0.0576(19) 0.0013(15) -0.0099(14) -0.0221(15)
C8 0.0646(19) 0.0589(19) 0.0571(19) 0.0150(15) -0.0120(15) -0.0171(15)
C24 0.0426(15) 0.0554(17) 0.0539(18) -0.0006(15) -0.0032(13) -0.0187(13)
C22 0.0467(16) 0.0491(16) 0.0570(18) 0.0048(14) -0.0059(13) -0.0182(13)
O2 0.132(3) 0.0796(19) 0.092(2) 0.0230(15) -0.0167(18) -0.0503(18)
C16 0.0598(19) 0.071(2) 0.0566(19) 0.0092(17) -0.0139(16) -0.0200(17)
C3 0.084(2) 0.058(2) 0.075(2) 0.0188(18) -0.0091(19) -0.0239(18)
C7 0.101(3) 0.072(2) 0.066(2) 0.007(2) 0.012(2) -0.024(2)
C6 0.082(2) 0.077(2) 0.059(2) 0.0055(18) -0.0098(18) -0.027(2)
C5 0.087(3) 0.089(3) 0.059(2) 0.014(2) -0.0036(19) -0.036(2)
C14 0.075(3) 0.090(3) 0.091(3) 0.006(3) -0.030(2) -0.008(2)
O10 0.118(3) 0.214(4) 0.094(2) -0.028(3) -0.020(2) -0.067(3)
C15 0.087(3) 0.100(3) 0.069(2) -0.003(2) -0.017(2) -0.008(3)
C4 0.116(3) 0.057(2) 0.075(3) -0.001(2) 0.007(2) -0.022(2)
C11 0.094(3) 0.125(4) 0.065(3) -0.012(3) -0.004(2) -0.050(3)
C12 0.104(4) 0.124(4) 0.083(3) -0.019(3) -0.025(3) -0.012(3)
C13 0.064(2) 0.155(5) 0.098(3) 0.033(3) -0.037(2) -0.028(3)
C1 0.142(5) 0.112(4) 0.114(4) 0.010(3) -0.024(3) -0.067(4)
C9 0.103(4) 0.257(8) 0.115(4) 0.034(5) -0.046(3) -0.085(5)
 
 
#----------------------------------------------------------------------------#
#                   MOLECULAR GEOMETRY                                       #
#----------------------------------------------------------------------------#
 
_geom_special_details
;
 All esds (except the esd in the dihedral angle between two l.s. planes)
 are estimated using the full covariance matrix.  The cell esds are taken
 into account individually in the estimation of esds in distances, angles
 and torsion angles; correlations between esds in cell parameters are only
 used when they are defined by crystal symmetry.  An approximate (isotropic)
 treatment of cell esds is used for estimating esds involving l.s. planes.
;
loop_
    _geom_bond_atom_site_label_1
    _geom_bond_atom_site_label_2
    _geom_bond_distance
    _geom_bond_site_symmetry_2
    _geom_bond_publ_flag
O25 C24 1.240(4) . ?
O26 C24 1.293(3) . ?
O26 H26 0.82 . ?
O28 C27 1.243(4) . ?
N17 C18 1.403(4) . ?
N17 C16 1.430(4) . ?
N17 C8 1.438(4) . ?
C23 C21 1.389(4) . ?
C23 C22 1.395(4) . ?
C23 H23 0.92(4) . ?
O29 C27 1.276(4) . ?
O29 H29 0.82 . ?
C18 C20 1.394(4) . ?
C18 C19 1.396(4) . ?
C21 C20 1.385(5) . ?
C21 C24 1.489(4) . ?
C27 C22 1.491(4) . ?
C20 H20 0.90(4) . ?
C19 C22 1.384(5) . ?
C19 H19 0.97(3) . ?
C8 C7 1.370(5) . ?
C8 C6 1.380(5) . ?
O2 C1 1.391(5) . ?
O2 C3 1.395(4) . ?
C16 C14 1.358(5) . ?
C16 C15 1.386(6) . ?
C3 C4 1.359(5) . ?
C3 C5 1.363(5) . ?
C7 C4 1.386(5) . ?
C7 H7 0.94(4) . ?
C6 C5 1.385(5) . ?
C6 H6 1.01(4) . ?
C5 H5 1.04(4) . ?
C14 C13 1.428(6) . ?
C14 H14 0.88(4) . ?
O10 C9 1.331(6) . ?
O10 C11 1.396(5) . ?
C15 C12 1.329(6) . ?
C15 H15 0.96(6) . ?
C4 H4 0.97(4) . ?
C11 C12 1.331(7) . ?
C11 C13 1.396(7) . ?
C12 H12 0.93 . ?
C13 H13 0.93 . ?
C1 H1A 0.96 . ?
C1 H1B 0.96 . ?
C1 H1C 0.96 . ?
C9 H9A 0.96 . ?
C9 H9B 0.96 . ?
C9 H9C 0.96 . ?
 
loop_
    _geom_angle_atom_site_label_1
    _geom_angle_atom_site_label_2
    _geom_angle_atom_site_label_3
    _geom_angle
    _geom_angle_site_symmetry_1
    _geom_angle_site_symmetry_3
    _geom_angle_publ_flag
C24 O26 H26 109.5 . . ?
C18 N17 C16 119.1(3) . . ?
C18 N17 C8 119.2(3) . . ?
C16 N17 C8 119.0(3) . . ?
C21 C23 C22 118.2(3) . . ?
C21 C23 H23 120(2) . . ?
C22 C23 H23 122(2) . . ?
C27 O29 H29 109.5 . . ?
C20 C18 C19 117.8(3) . . ?
C20 C18 N17 121.7(3) . . ?
C19 C18 N17 120.5(3) . . ?
C20 C21 C23 120.9(3) . . ?
C20 C21 C24 119.3(3) . . ?
C23 C21 C24 119.8(3) . . ?
O28 C27 O29 123.7(3) . . ?
O28 C27 C22 119.6(3) . . ?
O29 C27 C22 116.6(3) . . ?
C21 C20 C18 121.1(3) . . ?
C21 C20 H20 118(2) . . ?
C18 C20 H20 120(2) . . ?
C22 C19 C18 120.9(3) . . ?
C22 C19 H19 119.8(19) . . ?
C18 C19 H19 119.2(19) . . ?
C7 C8 C6 118.5(3) . . ?
C7 C8 N17 119.6(3) . . ?
C6 C8 N17 121.7(3) . . ?
O25 C24 O26 124.1(3) . . ?
O25 C24 C21 120.9(3) . . ?
O26 C24 C21 114.9(3) . . ?
C19 C22 C23 120.9(3) . . ?
C19 C22 C27 118.7(3) . . ?
C23 C22 C27 120.3(3) . . ?
C1 O2 C3 116.8(3) . . ?
C14 C16 C15 119.1(4) . . ?
C14 C16 N17 121.0(4) . . ?
C15 C16 N17 119.9(3) . . ?
C4 C3 C5 120.0(3) . . ?
C4 C3 O2 123.3(4) . . ?
C5 C3 O2 116.7(3) . . ?
C8 C7 C4 120.9(4) . . ?
C8 C7 H7 125(2) . . ?
C4 C7 H7 114(2) . . ?
C8 C6 C5 120.3(4) . . ?
C8 C6 H6 120(2) . . ?
C5 C6 H6 120(2) . . ?
C3 C5 C6 120.2(3) . . ?
C3 C5 H5 118(2) . . ?
C6 C5 H5 121(2) . . ?
C16 C14 C13 119.0(5) . . ?
C16 C14 H14 119(3) . . ?
C13 C14 H14 122(3) . . ?
C9 O10 C11 121.6(5) . . ?
C12 C15 C16 122.5(5) . . ?
C12 C15 H15 115(3) . . ?
C16 C15 H15 121(3) . . ?
C3 C4 C7 119.9(4) . . ?
C3 C4 H4 118(3) . . ?
C7 C4 H4 122(3) . . ?
C12 C11 O10 116.1(5) . . ?
C12 C11 C13 121.5(4) . . ?
O10 C11 C13 122.4(5) . . ?
C15 C12 C11 120.0(5) . . ?
C15 C12 H12 120 . . ?
C11 C12 H12 120 . . ?
C11 C13 C14 117.9(4) . . ?
C11 C13 H13 121.1 . . ?
C14 C13 H13 121.1 . . ?
O2 C1 H1A 109.5 . . ?
O2 C1 H1B 109.5 . . ?
H1A C1 H1B 109.5 . . ?
O2 C1 H1C 109.5 . . ?
H1A C1 H1C 109.5 . . ?
H1B C1 H1C 109.5 . . ?
O10 C9 H9A 109.5 . . ?
O10 C9 H9B 109.5 . . ?
H9A C9 H9B 109.5 . . ?
O10 C9 H9C 109.5 . . ?
H9A C9 H9C 109.5 . . ?
H9B C9 H9C 109.5 . . ?
 
